# Supplementary material for: Hospitalization Trends and Health Resource Use for Adult Congenital Heart Disease–Related Heart Failure
Source: PubMed Central journal article supplement — J Am Heart Assoc. 2018 Aug 5;7(15):e008775. doi: 10.1161/JAHA.118.008775 (PMC6201452; doi:10.1161/jaha.118.008775), 2018-08-05
Supplement: JAH3-7-e008775-s001.pdf [file JAH3-7-e008775-s001.pdf]

# **SUPPLEMENTAL MATERIAL**

Table S1. ICD-9 codes for ACHD HF patient comorbidities

| <b>Comorbidities</b>             | <b>ICD9 Code</b>                                          |
|----------------------------------|-----------------------------------------------------------|
| Hypertension                     | 4011;4019;40210;40290;40410;40490;40511;40519;40591;40599 |
| Fluid or electrolyte disturbance | 276                                                       |
| Chronic lung disease             | 490-499 (not including 49392);500-505;5064                |
| Coronary artery disease          | 414.01                                                    |
| Diabetes mellitus                | 250                                                       |
| Chronic kidney disease           | 40311;40391;40412;40492;585;586;V420;V451;V560;V568       |
| Iron-deficiency anemia           | 2801;2808;2809;281;2859                                   |
| Hypothyroidism                   | 243;2440-2442;2448;2449                                   |
| Coagulopathy                     | 286;2871;2873;2874;2875;                                  |
| Obesity                          | 2780                                                      |

ACHD indicates adult congenital heart disease; HF, heart failure; *ICD-9, International Classification of Diseases Ninth Revision.*
